# Supplementary material for: Atmospheric oxidation reactions of imidazole initiated by hydroxyl radicals: kinetics and mechanism of reactions and atmospheric implications
Source: Royal Society of Chemistry journal article supplement (doi:10.1039/c9cp00632j), 2019-01-01
Supplement: c9cp00632j1.pdf [file c9cp00632j1.pdf]

# Atmospheric oxidation reactions of imidazole initiated by hydroxyl radicals: Kinetics and mechanism reactions and atmospheric implications

Zahra Safaei<sup>a</sup>, Abolfazl Shiroudi<sup>b,\*</sup>, Ehsan Zahedi<sup>c</sup>, and Mika Sillanpää<sup>a</sup>

<sup>a</sup> Department of Green Chemistry, LUT University, Sammonkatu 12, FI-50130 Mikkeli, Finland

<sup>b</sup> Young Researchers and Elite Club, East Tehran Branch, Islamic Azad University, Tehran, Iran

<sup>c</sup> Chemistry Department, Shahrood Branch, Islamic Azad University, Shahrood, Iran

## **Electronic Supplementary Information (ESI)**

---

\* Corresponding author: E-mail: abolfazl.shiroudi@iauet.ac.ir (A. Shiroudi)

**Table S1:** Kinetic rate constants for the reactions involved in the reaction pathways **1–3** by means of RRKM theory at different pressure and temperatures, according to the computed M06-2x energy profiles. ( $x=2,3$ )

**Table S1a:**  $T= 297$  K.

| $P$      | Equilibrium constants ( $\text{bar}^{-1}$ ) |                  | Unimolecular rate constants ( $\text{s}^{-1}$ ) |           |           | Effective rate constants ( $\text{cm}^3 \text{ molecule}^{-1} \text{ s}^{-1}$ ) |                      |                      |                                |
|----------|---------------------------------------------|------------------|-------------------------------------------------|-----------|-----------|---------------------------------------------------------------------------------|----------------------|----------------------|--------------------------------|
|          | $K_{P(1)}$                                  | $K_{P(x),x=2,3}$ | $k_2$ (1)                                       | $k_2$ (2) | $k_2$ (3) | $k_{\text{eff}}$ (1)                                                            | $k_{\text{eff}}$ (2) | $k_{\text{eff}}$ (3) | $k_{\text{eff}}$ [(1)+(3)+(2)] |
| 1.00E+08 | 9.22E-04                                    | 7.39E-04         | 3.13E+09                                        | 6.90E+07  | 7.89E+10  | 1.19E-13                                                                        | 2.09E-15             | 2.39E-12             | 2.51E-12                       |
| 1.00E+06 | 9.22E-04                                    | 7.39E-04         | 3.13E+09                                        | 6.90E+07  | 7.89E+10  | 1.19E-13                                                                        | 2.09E-15             | 2.39E-12             | 2.51E-12                       |
| 1.00E+04 | 9.22E-04                                    | 7.39E-04         | 3.13E+09                                        | 6.90E+07  | 7.84E+10  | 1.18E-13                                                                        | 2.09E-15             | 2.38E-12             | 2.50E-12                       |
| 1.00E+02 | 9.22E-04                                    | 7.39E-04         | 2.88E+09                                        | 6.85E+07  | 5.08E+10  | 1.09E-13                                                                        | 2.08E-15             | 1.54E-12             | 1.65E-12                       |
| 1.00E+00 | 9.22E-04                                    | 7.39E-04         | 4.49E+08                                        | 4.33E+07  | 1.57E+09  | 1.70E-14                                                                        | 1.31E-15             | 4.77E-14             | 6.60E-14                       |
| 1.00E-02 | 9.22E-04                                    | 7.39E-04         | 5.94E+06                                        | 1.89E+06  | 1.62E+07  | 2.24E-16                                                                        | 5.74E-17             | 4.90E-16             | 7.72E-16                       |
| 1.00E-04 | 9.22E-04                                    | 7.39E-04         | 5.96E+04                                        | 2.03E+04  | 1.62E+05  | 2.25E-18                                                                        | 6.15E-19             | 4.90E-18             | 7.77E-18                       |
| 1.00E-06 | 9.22E-04                                    | 7.39E-04         | 5.96E+02                                        | 2.03E+02  | 1.62E+03  | 2.25E-20                                                                        | 6.15E-21             | 4.90E-20             | 7.77E-20                       |
| 1.00E-08 | 9.22E-04                                    | 7.39E-04         | 5.96E+00                                        | 2.03E+00  | 1.62E+01  | 2.25E-22                                                                        | 6.15E-23             | 4.90E-22             | 7.77E-22                       |
| 1.00E-10 | 9.22E-04                                    | 7.39E-04         | 5.96E-02                                        | 2.03E-02  | 1.62E-01  | 2.25E-24                                                                        | 6.15E-25             | 4.90E-24             | 7.77E-24                       |

**Table S1b:**  $T= 316$  K.

| $P$      | Equilibrium constants ( $\text{bar}^{-1}$ ) |                  | Unimolecular rate constants ( $\text{s}^{-1}$ ) |           |           | Effective rate constants ( $\text{cm}^3 \text{ molecule}^{-1} \text{ s}^{-1}$ ) |                      |                      |                                |
|----------|---------------------------------------------|------------------|-------------------------------------------------|-----------|-----------|---------------------------------------------------------------------------------|----------------------|----------------------|--------------------------------|
|          | $K_{P(1)}$                                  | $K_{P(X),X=2,3}$ | $k_2$ (1)                                       | $k_2$ (2) | $k_2$ (3) | $k_{\text{eff}}$ (1)                                                            | $k_{\text{eff}}$ (2) | $k_{\text{eff}}$ (3) | $k_{\text{eff}}$ [(1)+(3)+(2)] |
| 1.00E+08 | 6.66E-04                                    | 5.70E-04         | 4.31E+09                                        | 1.13E+08  | 8.72E+10  | 1.25E-13                                                                        | 2.80E-15             | 2.17E-12             | 2.30E-12                       |
| 1.00E+06 | 6.66E-04                                    | 5.70E-04         | 4.31E+09                                        | 1.13E+08  | 8.72E+10  | 1.25E-13                                                                        | 2.80E-15             | 2.17E-12             | 2.30E-12                       |
| 1.00E+04 | 6.66E-04                                    | 5.70E-04         | 4.31E+09                                        | 1.13E+08  | 8.66E+10  | 1.25E-13                                                                        | 2.80E-15             | 2.15E-12             | 2.28E-12                       |
| 1.00E+02 | 6.66E-04                                    | 5.70E-04         | 3.91E+09                                        | 1.11E+08  | 5.40E+10  | 1.14E-13                                                                        | 2.77E-15             | 1.34E-12             | 1.46E-12                       |
| 1.00E+00 | 6.66E-04                                    | 5.70E-04         | 5.38E+08                                        | 6.57E+07  | 1.55E+09  | 1.56E-14                                                                        | 1.64E-15             | 3.86E-14             | 5.58E-14                       |
| 1.00E-02 | 6.66E-04                                    | 5.70E-04         | 6.89E+06                                        | 2.57E+06  | 1.59E+07  | 2.00E-16                                                                        | 6.39E-17             | 3.95E-16             | 6.59E-16                       |
| 1.00E-04 | 6.66E-04                                    | 5.70E-04         | 6.91E+04                                        | 2.73E+04  | 1.59E+05  | 2.01E-18                                                                        | 6.78E-19             | 3.95E-18             | 6.64E-18                       |
| 1.00E-06 | 6.66E-04                                    | 5.70E-04         | 6.91E+02                                        | 2.73E+02  | 1.59E+03  | 2.01E-20                                                                        | 6.79E-21             | 3.95E-20             | 6.64E-20                       |
| 1.00E-08 | 6.66E-04                                    | 5.70E-04         | 6.91E+00                                        | 2.73E+00  | 1.59E+01  | 2.01E-22                                                                        | 6.79E-23             | 3.95E-22             | 6.64E-22                       |
| 1.00E-10 | 6.66E-04                                    | 5.70E-04         | 6.91E-02                                        | 2.73E-02  | 1.59E-01  | 2.01E-24                                                                        | 6.79E-25             | 3.95E-24             | 6.64E-24                       |

**Table S1c:**  $T= 331$  K.

| $P$      | Equilibrium constants ( $\text{bar}^{-1}$ ) |                  | Unimolecular rate constants ( $\text{s}^{-1}$ ) |           |           | Effective rate constants ( $\text{cm}^3 \text{ molecule}^{-1} \text{ s}^{-1}$ ) |                      |                      |                                |
|----------|---------------------------------------------|------------------|-------------------------------------------------|-----------|-----------|---------------------------------------------------------------------------------|----------------------|----------------------|--------------------------------|
|          | $K_{P(1)}$                                  | $K_{P(X),X=2,3}$ | $k_2$ (1)                                       | $k_2$ (2) | $k_2$ (3) | $k_{\text{eff}}$ (1)                                                            | $k_{\text{eff}}$ (2) | $k_{\text{eff}}$ (3) | $k_{\text{eff}}$ [(1)+(3)+(2)] |
| 1.00E+08 | 5.30E-04                                    | 4.75E-04         | 5.40E+09                                        | 1.59E+08  | 9.35E+10  | 1.31E-13                                                                        | 3.45E-15             | 2.03E-12             | 2.17E-12                       |
| 1.00E+06 | 5.30E-04                                    | 4.75E-04         | 5.40E+09                                        | 1.59E+08  | 9.35E+10  | 1.31E-13                                                                        | 3.45E-15             | 2.03E-12             | 2.16E-12                       |
| 1.00E+04 | 5.30E-04                                    | 4.75E-04         | 5.40E+09                                        | 1.59E+08  | 9.29E+10  | 1.31E-13                                                                        | 3.45E-15             | 2.02E-12             | 2.15E-12                       |
| 1.00E+02 | 5.30E-04                                    | 4.75E-04         | 4.84E+09                                        | 1.57E+08  | 5.62E+10  | 1.17E-13                                                                        | 3.41E-15             | 1.22E-12             | 1.34E-12                       |
| 1.00E+00 | 5.30E-04                                    | 4.75E-04         | 6.05E+08                                        | 8.76E+07  | 1.53E+09  | 1.47E-14                                                                        | 1.90E-15             | 3.32E-14             | 4.97E-14                       |
| 1.00E-02 | 5.30E-04                                    | 4.75E-04         | 7.57E+06                                        | 3.15E+06  | 1.56E+07  | 1.83E-16                                                                        | 6.83E-17             | 3.39E-16             | 5.91E-16                       |
| 1.00E-04 | 5.30E-04                                    | 4.75E-04         | 7.60E+04                                        | 3.32E+04  | 1.56E+05  | 1.84E-18                                                                        | 7.21E-19             | 3.39E-18             | 5.95E-18                       |
| 1.00E-06 | 5.30E-04                                    | 4.75E-04         | 7.60E+02                                        | 3.32E+02  | 1.56E+03  | 1.84E-20                                                                        | 7.22E-21             | 3.39E-20             | 5.95E-20                       |
| 1.00E-08 | 5.30E-04                                    | 4.75E-04         | 7.60E+00                                        | 3.32E+00  | 1.56E+01  | 1.84E-22                                                                        | 7.22E-23             | 3.39E-22             | 5.95E-22                       |
| 1.00E-10 | 5.30E-04                                    | 4.75E-04         | 7.60E-02                                        | 3.32E-02  | 1.56E-01  | 1.84E-24                                                                        | 7.22E-25             | 3.39E-24             | 5.95E-24                       |

**Table S1d:**  $T= 344$  K.

| $P$      | Equilibrium constants ( $\text{bar}^{-1}$ ) |                         | Unimolecular rate constants ( $\text{s}^{-1}$ ) |           |           | Effective rate constants ( $\text{cm}^3 \text{ molecule}^{-1} \text{ s}^{-1}$ ) |                      |                      |                                |
|----------|---------------------------------------------|-------------------------|-------------------------------------------------|-----------|-----------|---------------------------------------------------------------------------------|----------------------|----------------------|--------------------------------|
|          | $K_{\text{P}(1)}$                           | $K_{\text{P}(X),X=2,3}$ | $k_2$ (1)                                       | $k_2$ (2) | $k_2$ (3) | $k_{\text{eff}}$ (1)                                                            | $k_{\text{eff}}$ (2) | $k_{\text{eff}}$ (3) | $k_{\text{eff}}$ [(1)+(3)+(2)] |
| 1.00E+08 | 4.43E-04                                    | 4.12E-04                | 6.47E+09                                        | 2.09E+08  | 9.89E+10  | 1.36E-13                                                                        | 4.09E-15             | 1.94E-12             | 2.08E-12                       |
| 1.00E+06 | 4.43E-04                                    | 4.12E-04                | 6.47E+09                                        | 2.09E+08  | 9.89E+10  | 1.36E-13                                                                        | 4.09E-15             | 1.94E-12             | 2.08E-12                       |
| 1.00E+04 | 4.43E-04                                    | 4.12E-04                | 6.46E+09                                        | 2.09E+08  | 9.82E+10  | 1.36E-13                                                                        | 4.09E-15             | 1.92E-12             | 2.06E-12                       |
| 1.00E+02 | 4.43E-04                                    | 4.12E-04                | 5.72E+09                                        | 2.07E+08  | 5.79E+10  | 1.20E-13                                                                        | 4.04E-15             | 1.13E-12             | 1.26E-12                       |
| 1.00E+00 | 4.43E-04                                    | 4.12E-04                | 6.59E+08                                        | 1.09E+08  | 1.50E+09  | 1.39E-14                                                                        | 2.14E-15             | 2.95E-14             | 4.55E-14                       |
| 1.00E-02 | 4.43E-04                                    | 4.12E-04                | 8.11E+06                                        | 3.67E+06  | 1.53E+07  | 1.71E-16                                                                        | 7.17E-17             | 3.00E-16             | 5.43E-16                       |
| 1.00E-04 | 4.43E-04                                    | 4.12E-04                | 8.13E+04                                        | 3.85E+04  | 1.53E+05  | 1.71E-18                                                                        | 7.54E-19             | 3.00E-18             | 5.47E-18                       |
| 1.00E-06 | 4.43E-04                                    | 4.12E-04                | 8.13E+02                                        | 3.85E+02  | 1.53E+03  | 1.71E-20                                                                        | 7.54E-21             | 3.00E-20             | 5.47E-20                       |
| 1.00E-08 | 4.43E-04                                    | 4.12E-04                | 8.13E+00                                        | 3.85E+00  | 1.53E+01  | 1.71E-22                                                                        | 7.54E-23             | 3.00E-22             | 5.47E-22                       |
| 1.00E-10 | 4.43E-04                                    | 4.12E-04                | 8.13E-02                                        | 3.85E-02  | 1.53E-01  | 1.71E-24                                                                        | 7.54E-25             | 3.00E-24             | 5.47E-24                       |

**Table S1e:**  $T= 353$  K.

| $P$      | Equilibrium constants ( $\text{bar}^{-1}$ ) |                  | Unimolecular rate constants ( $\text{s}^{-1}$ ) |           |           | Effective rate constants ( $\text{cm}^3 \text{ molecule}^{-1} \text{ s}^{-1}$ ) |                      |                      |                                |
|----------|---------------------------------------------|------------------|-------------------------------------------------|-----------|-----------|---------------------------------------------------------------------------------|----------------------|----------------------|--------------------------------|
|          | $K_{P(1)}$                                  | $K_{P(X),X=2,3}$ | $k_2$ (1)                                       | $k_2$ (2) | $k_2$ (3) | $k_{\text{eff}}$ (1)                                                            | $k_{\text{eff}}$ (2) | $k_{\text{eff}}$ (3) | $k_{\text{eff}}$ [(1)+(3)+(2)] |
| 1.00E+08 | 3.95E-04                                    | 3.75E-04         | 7.26E+09                                        | 2.50E+08  | 1.03E+11  | 1.40E-13                                                                        | 4.57E-15             | 1.87E-12             | 2.02E-12                       |
| 1.00E+06 | 3.95E-04                                    | 3.75E-04         | 7.26E+09                                        | 2.50E+08  | 1.03E+11  | 1.40E-13                                                                        | 4.57E-15             | 1.87E-12             | 2.02E-12                       |
| 1.00E+04 | 3.95E-04                                    | 3.75E-04         | 7.25E+09                                        | 2.50E+08  | 1.02E+11  | 1.40E-13                                                                        | 4.57E-15             | 1.86E-12             | 2.00E-12                       |
| 1.00E+02 | 3.95E-04                                    | 3.75E-04         | 6.37E+09                                        | 2.47E+08  | 5.89E+10  | 1.23E-13                                                                        | 4.51E-15             | 1.08E-12             | 1.20E-12                       |
| 1.00E+00 | 3.95E-04                                    | 3.75E-04         | 6.95E+08                                        | 1.26E+08  | 1.49E+09  | 1.34E-14                                                                        | 2.30E-15             | 2.72E-14             | 4.29E-14                       |
| 1.00E-02 | 3.95E-04                                    | 3.75E-04         | 8.45E+06                                        | 4.03E+06  | 1.52E+07  | 1.63E-16                                                                        | 7.37E-17             | 2.77E-16             | 5.13E-16                       |
| 1.00E-04 | 3.95E-04                                    | 3.75E-04         | 8.47E+04                                        | 4.22E+04  | 1.52E+05  | 1.63E-18                                                                        | 7.72E-19             | 2.77E-18             | 5.17E-18                       |
| 1.00E-06 | 3.95E-04                                    | 3.75E-04         | 8.47E+02                                        | 4.22E+02  | 1.52E+03  | 1.63E-20                                                                        | 7.72E-21             | 2.77E-20             | 5.18E-20                       |
| 1.00E-08 | 3.95E-04                                    | 3.75E-04         | 8.47E+00                                        | 4.22E+00  | 1.52E+01  | 1.63E-22                                                                        | 7.72E-23             | 2.77E-22             | 5.18E-22                       |
| 1.00E-10 | 3.95E-04                                    | 3.75E-04         | 8.47E-02                                        | 4.22E-02  | 1.52E-01  | 1.63E-24                                                                        | 7.72E-25             | 2.77E-24             | 5.18E-24                       |

**Table S1f:**  $T= 362$  K.

| $P$      | Equilibrium constants ( $\text{bar}^{-1}$ ) |                  | Unimolecular rate constants ( $\text{s}^{-1}$ ) |           |           | Effective rate constants ( $\text{cm}^3 \text{ molecule}^{-1} \text{ s}^{-1}$ ) |                      |                      |                                |
|----------|---------------------------------------------|------------------|-------------------------------------------------|-----------|-----------|---------------------------------------------------------------------------------|----------------------|----------------------|--------------------------------|
|          | $K_{P(1)}$                                  | $K_{P(X),X=2,3}$ | $k_2$ (1)                                       | $k_2$ (2) | $k_2$ (3) | $k_{\text{eff}}$ (1)                                                            | $k_{\text{eff}}$ (2) | $k_{\text{eff}}$ (3) | $k_{\text{eff}}$ [(1)+(3)+(2)] |
| 1.00E+08 | 3.54E-04                                    | 3.44E-04         | 8.11E+09                                        | 2.96E+08  | 1.06E+11  | 1.43E-13                                                                        | 5.09E-15             | 1.82E-12             | 1.97E-12                       |
| 1.00E+06 | 3.54E-04                                    | 3.44E-04         | 8.11E+09                                        | 2.96E+08  | 1.06E+11  | 1.43E-13                                                                        | 5.09E-15             | 1.82E-12             | 1.97E-12                       |
| 1.00E+04 | 3.54E-04                                    | 3.44E-04         | 8.09E+09                                        | 2.96E+08  | 1.05E+11  | 1.43E-13                                                                        | 5.09E-15             | 1.81E-12             | 1.96E-12                       |
| 1.00E+02 | 3.54E-04                                    | 3.44E-04         | 7.06E+09                                        | 2.92E+08  | 5.98E+10  | 1.25E-13                                                                        | 5.02E-15             | 1.03E-12             | 1.16E-12                       |
| 1.00E+00 | 3.54E-04                                    | 3.44E-04         | 7.28E+08                                        | 1.44E+08  | 1.47E+09  | 1.29E-14                                                                        | 2.47E-15             | 2.53E-14             | 4.06E-14                       |
| 1.00E-02 | 3.54E-04                                    | 3.44E-04         | 8.76E+06                                        | 4.39E+06  | 1.50E+07  | 1.55E-16                                                                        | 7.55E-17             | 2.57E-16             | 4.88E-16                       |
| 1.00E-04 | 3.54E-04                                    | 3.44E-04         | 8.78E+04                                        | 4.59E+04  | 1.50E+05  | 1.55E-18                                                                        | 7.89E-19             | 2.57E-18             | 4.92E-18                       |
| 1.00E-06 | 3.54E-04                                    | 3.44E-04         | 8.78E+02                                        | 4.59E+02  | 1.50E+03  | 1.55E-20                                                                        | 7.90E-21             | 2.57E-20             | 4.92E-20                       |
| 1.00E-08 | 3.54E-04                                    | 3.44E-04         | 8.78E+00                                        | 4.59E+00  | 1.50E+01  | 1.55E-22                                                                        | 7.90E-23             | 2.57E-22             | 4.92E-22                       |
| 1.00E-10 | 3.54E-04                                    | 3.44E-04         | 8.78E-02                                        | 4.59E-02  | 1.50E-01  | 1.55E-24                                                                        | 7.90E-25             | 2.57E-24             | 4.92E-24                       |

**Table S1g:**  $T= 386$  K.

| $P$      | Equilibrium constants ( $\text{bar}^{-1}$ ) |                  | Unimolecular rate constants ( $\text{s}^{-1}$ ) |           |           | Effective rate constants ( $\text{cm}^3 \text{ molecule}^{-1} \text{ s}^{-1}$ ) |                      |                      |                                |
|----------|---------------------------------------------|------------------|-------------------------------------------------|-----------|-----------|---------------------------------------------------------------------------------|----------------------|----------------------|--------------------------------|
|          | $K_{P(1)}$                                  | $K_{P(X),X=2,3}$ | $k_2$ (1)                                       | $k_2$ (2) | $k_2$ (3) | $k_{\text{eff}}$ (1)                                                            | $k_{\text{eff}}$ (2) | $k_{\text{eff}}$ (3) | $k_{\text{eff}}$ [(1)+(3)+(2)] |
| 1.00E+08 | 2.72E-04                                    | 2.79E-04         | 1.06E+10                                        | 4.47E+08  | 1.15E+11  | 1.54E-13                                                                        | 6.64E-15             | 1.71E-12             | 1.87E-12                       |
| 1.00E+06 | 2.72E-04                                    | 2.79E-04         | 1.06E+10                                        | 4.47E+08  | 1.15E+11  | 1.54E-13                                                                        | 6.64E-15             | 1.71E-12             | 1.87E-12                       |
| 1.00E+04 | 2.72E-04                                    | 2.79E-04         | 1.06E+10                                        | 4.47E+08  | 1.14E+11  | 1.53E-13                                                                        | 6.64E-15             | 1.70E-12             | 1.86E-12                       |
| 1.00E+02 | 2.72E-04                                    | 2.79E-04         | 9.00E+09                                        | 4.39E+08  | 6.19E+10  | 1.31E-13                                                                        | 6.53E-15             | 9.21E-13             | 1.06E-12                       |
| 1.00E+00 | 2.72E-04                                    | 2.79E-04         | 8.07E+08                                        | 1.95E+08  | 1.42E+09  | 1.17E-14                                                                        | 2.90E-15             | 2.11E-14             | 3.57E-14                       |
| 1.00E-02 | 2.72E-04                                    | 2.79E-04         | 9.46E+06                                        | 5.34E+06  | 1.44E+07  | 1.37E-16                                                                        | 7.94E-17             | 2.15E-16             | 4.31E-16                       |
| 1.00E-04 | 2.72E-04                                    | 2.79E-04         | 9.48E+04                                        | 5.54E+04  | 1.44E+05  | 1.37E-18                                                                        | 8.24E-19             | 2.15E-18             | 4.35E-18                       |
| 1.00E-06 | 2.72E-04                                    | 2.79E-04         | 9.48E+02                                        | 5.54E+02  | 1.44E+03  | 1.37E-20                                                                        | 8.24E-21             | 2.15E-20             | 4.35E-20                       |
| 1.00E-08 | 2.72E-04                                    | 2.79E-04         | 9.48E+00                                        | 5.54E+00  | 1.44E+01  | 1.37E-22                                                                        | 8.24E-23             | 2.15E-22             | 4.35E-22                       |
| 1.00E-10 | 2.72E-04                                    | 2.79E-04         | 9.48E-02                                        | 5.54E-02  | 1.44E-01  | 1.37E-24                                                                        | 8.24E-25             | 2.15E-24             | 4.35E-24                       |



**Table S1h:**  $T= 402$  K.

| $P$      | Equilibrium constants ( $\text{bar}^{-1}$ ) |                  | Unimolecular rate constants ( $\text{s}^{-1}$ ) |           |           | Effective rate constants ( $\text{cm}^3 \text{ molecule}^{-1} \text{ s}^{-1}$ ) |                      |                      |                                |
|----------|---------------------------------------------|------------------|-------------------------------------------------|-----------|-----------|---------------------------------------------------------------------------------|----------------------|----------------------|--------------------------------|
|          | $K_{P(1)}$                                  | $K_{P(X),X=2,3}$ | $k_2$ (1)                                       | $k_2$ (2) | $k_2$ (3) | $k_{\text{eff}}$ (1)                                                            | $k_{\text{eff}}$ (2) | $k_{\text{eff}}$ (3) | $k_{\text{eff}}$ [(1)+(3)+(2)] |
| 1.00E+08 | 2.32E-04                                    | 2.47E-04         | 1.24E+10                                        | 5.72E+08  | 1.21E+11  | 1.60E-13                                                                        | 7.84E-15             | 1.66E-12             | 1.83E-12                       |
| 1.00E+06 | 2.32E-04                                    | 2.47E-04         | 1.24E+10                                        | 5.72E+08  | 1.21E+11  | 1.60E-13                                                                        | 7.84E-15             | 1.66E-12             | 1.83E-12                       |
| 1.00E+04 | 2.32E-04                                    | 2.47E-04         | 1.24E+10                                        | 5.72E+08  | 1.20E+11  | 1.60E-13                                                                        | 7.84E-15             | 1.64E-12             | 1.81E-12                       |
| 1.00E+02 | 2.32E-04                                    | 2.47E-04         | 1.04E+10                                        | 5.60E+08  | 6.30E+10  | 1.34E-13                                                                        | 7.68E-15             | 8.64E-13             | 1.01E-12                       |
| 1.00E+00 | 2.32E-04                                    | 2.47E-04         | 8.50E+08                                        | 2.32E+08  | 1.39E+09  | 1.09E-14                                                                        | 3.19E-15             | 1.90E-14             | 3.32E-14                       |
| 1.00E-02 | 2.32E-04                                    | 2.47E-04         | 9.81E+06                                        | 5.93E+06  | 1.41E+07  | 1.26E-16                                                                        | 8.13E-17             | 1.93E-16             | 4.01E-16                       |
| 1.00E-04 | 2.32E-04                                    | 2.47E-04         | 9.83E+04                                        | 6.13E+04  | 1.41E+05  | 1.27E-18                                                                        | 8.41E-19             | 1.93E-18             | 4.04E-18                       |
| 1.00E-06 | 2.32E-04                                    | 2.47E-04         | 9.83E+02                                        | 6.13E+02  | 1.41E+03  | 1.27E-20                                                                        | 8.41E-21             | 1.93E-20             | 4.04E-20                       |
| 1.00E-08 | 2.32E-04                                    | 2.47E-04         | 9.83E+00                                        | 6.13E+00  | 1.41E+01  | 1.27E-22                                                                        | 8.41E-23             | 1.93E-22             | 4.04E-22                       |
| 1.00E-10 | 2.32E-04                                    | 2.47E-04         | 9.83E-02                                        | 6.13E-02  | 1.41E-01  | 1.27E-24                                                                        | 8.41E-25             | 1.93E-24             | 4.04E-24                       |

**Table S1i:**  $T= 425$  K.

| $P$      | Equilibrium constants ( $\text{bar}^{-1}$ ) |                  | Unimolecular rate constants ( $\text{s}^{-1}$ ) |           |           | Effective rate constants ( $\text{cm}^3 \text{ molecule}^{-1} \text{ s}^{-1}$ ) |                      |                      |                                |
|----------|---------------------------------------------|------------------|-------------------------------------------------|-----------|-----------|---------------------------------------------------------------------------------|----------------------|----------------------|--------------------------------|
|          | $K_{P(1)}$                                  | $K_{P(X),X=2,3}$ | $k_2$ (1)                                       | $k_2$ (2) | $k_2$ (3) | $k_{\text{eff}}$ (1)                                                            | $k_{\text{eff}}$ (2) | $k_{\text{eff}}$ (3) | $k_{\text{eff}}$ [(1)+(3)+(2)] |
| 1.00E+08 | 1.90E-04                                    | 2.11E-04         | 1.53E+10                                        | 7.89E+08  | 1.29E+11  | 1.71E-13                                                                        | 9.77E-15             | 1.60E-12             | 1.78E-12                       |
| 1.00E+06 | 1.90E-04                                    | 2.11E-04         | 1.53E+10                                        | 7.89E+08  | 1.29E+11  | 1.71E-13                                                                        | 9.77E-15             | 1.60E-12             | 1.78E-12                       |
| 1.00E+04 | 1.90E-04                                    | 2.11E-04         | 1.53E+10                                        | 7.88E+08  | 1.28E+11  | 1.70E-13                                                                        | 9.76E-15             | 1.58E-12             | 1.76E-12                       |
| 1.00E+02 | 1.90E-04                                    | 2.11E-04         | 1.25E+10                                        | 7.69E+08  | 6.42E+10  | 1.39E-13                                                                        | 9.52E-15             | 7.95E-13             | 9.44E-13                       |
| 1.00E+00 | 1.90E-04                                    | 2.11E-04         | 9.00E+08                                        | 2.88E+08  | 1.34E+09  | 1.00E-14                                                                        | 3.57E-15             | 1.66E-14             | 3.02E-14                       |
| 1.00E-02 | 1.90E-04                                    | 2.11E-04         | 1.02E+07                                        | 6.70E+06  | 1.36E+07  | 1.14E-16                                                                        | 8.30E-17             | 1.68E-16             | 3.65E-16                       |
| 1.00E-04 | 1.90E-04                                    | 2.11E-04         | 1.02E+05                                        | 6.90E+04  | 1.36E+05  | 1.14E-18                                                                        | 8.54E-19             | 1.68E-18             | 3.67E-18                       |
| 1.00E-06 | 1.90E-04                                    | 2.11E-04         | 1.02E+03                                        | 6.90E+02  | 1.36E+03  | 1.14E-20                                                                        | 8.54E-21             | 1.68E-20             | 3.67E-20                       |
| 1.00E-08 | 1.90E-04                                    | 2.11E-04         | 1.02E+01                                        | 6.90E+00  | 1.36E+01  | 1.14E-22                                                                        | 8.54E-23             | 1.68E-22             | 3.67E-22                       |
| 1.00E-10 | 1.90E-04                                    | 2.11E-04         | 1.02E-01                                        | 6.90E-02  | 1.36E-01  | 1.14E-24                                                                        | 8.54E-25             | 1.68E-24             | 3.67E-24                       |

**Table S1j:**  $T= 440$  K.

| $P$      | Equilibrium constants ( $\text{bar}^{-1}$ ) |                  | Unimolecular rate constants ( $\text{s}^{-1}$ ) |           |           | Effective rate constants ( $\text{cm}^3 \text{ molecule}^{-1} \text{ s}^{-1}$ ) |                      |                      |                                |
|----------|---------------------------------------------|------------------|-------------------------------------------------|-----------|-----------|---------------------------------------------------------------------------------|----------------------|----------------------|--------------------------------|
|          | $K_{P(1)}$                                  | $K_{P(X),X=2,3}$ | $k_2$ (1)                                       | $k_2$ (2) | $k_2$ (3) | $k_{\text{eff}}$ (1)                                                            | $k_{\text{eff}}$ (2) | $k_{\text{eff}}$ (3) | $k_{\text{eff}}$ [(1)+(3)+(2)] |
| 1.00E+08 | 1.69E-04                                    | 1.92E-04         | 1.74E+10                                        | 9.55E+08  | 1.34E+11  | 1.78E-13                                                                        | 1.11E-14             | 1.56E-12             | 1.75E-12                       |
| 1.00E+06 | 1.69E-04                                    | 1.92E-04         | 1.73E+10                                        | 9.55E+08  | 1.34E+11  | 1.78E-13                                                                        | 1.11E-14             | 1.56E-12             | 1.75E-12                       |
| 1.00E+04 | 1.69E-04                                    | 1.92E-04         | 1.73E+10                                        | 9.54E+08  | 1.33E+11  | 1.78E-13                                                                        | 1.11E-14             | 1.55E-12             | 1.74E-12                       |
| 1.00E+02 | 1.69E-04                                    | 1.92E-04         | 1.39E+10                                        | 9.28E+08  | 6.48E+10  | 1.42E-13                                                                        | 1.08E-14             | 7.56E-13             | 9.09E-13                       |
| 1.00E+00 | 1.69E-04                                    | 1.92E-04         | 9.25E+08                                        | 3.25E+08  | 1.31E+09  | 9.50E-15                                                                        | 3.79E-15             | 1.53E-14             | 2.86E-14                       |
| 1.00E-02 | 1.69E-04                                    | 1.92E-04         | 1.04E+07                                        | 7.15E+06  | 1.33E+07  | 1.06E-16                                                                        | 8.34E-17             | 1.55E-16             | 3.44E-16                       |
| 1.00E-04 | 1.69E-04                                    | 1.92E-04         | 1.04E+05                                        | 7.33E+04  | 1.33E+05  | 1.06E-18                                                                        | 8.56E-19             | 1.55E-18             | 3.47E-18                       |
| 1.00E-06 | 1.69E-04                                    | 1.92E-04         | 1.04E+03                                        | 7.34E+02  | 1.33E+03  | 1.06E-20                                                                        | 8.56E-21             | 1.55E-20             | 3.47E-20                       |
| 1.00E-08 | 1.69E-04                                    | 1.92E-04         | 1.04E+01                                        | 7.34E+00  | 1.33E+01  | 1.06E-22                                                                        | 8.56E-23             | 1.55E-22             | 3.47E-22                       |
| 1.00E-10 | 1.69E-04                                    | 1.92E-04         | 1.04E-01                                        | 7.34E-02  | 1.33E-01  | 1.06E-24                                                                        | 8.56E-25             | 1.55E-24             | 3.47E-24                       |

**Table S2:** Kinetic rate constants ( $k$ ) for OH attack onto C<sub>2</sub>, C<sub>4</sub>, and C<sub>5</sub> positions of imidazole for different addition products by means of TST ( $P = 1$  bar). ( $x=2,3$ )

| $T$<br>(K) | $k_f$ (cm <sup>3</sup> molecule <sup>-1</sup> s <sup>-1</sup> ) |                               |                               | $k_f$ [OH] (s <sup>-1</sup> ) |                               |                               | $k_r$ (s <sup>-1</sup> )      |                               |                               |
|------------|-----------------------------------------------------------------|-------------------------------|-------------------------------|-------------------------------|-------------------------------|-------------------------------|-------------------------------|-------------------------------|-------------------------------|
|            | R→P1<br>$k_{1f}$ ( <b>1</b> )                                   | R→P2<br>$k_{2f}$ ( <b>2</b> ) | R→P3<br>$k_{3f}$ ( <b>3</b> ) | R→P1<br>$k_{1f}$ ( <b>1</b> ) | R→P2<br>$k_{2f}$ ( <b>2</b> ) | R→P3<br>$k_{3f}$ ( <b>3</b> ) | P1→R<br>$k_{1r}$ ( <b>1</b> ) | P2→R<br>$k_{1r}$ ( <b>2</b> ) | P3→R<br>$k_{1r}$ ( <b>3</b> ) |
| 297        | 6.61E-14                                                        | 1.15E-15                      | 1.22E-12                      | 1.32E-07                      | 2.30E-09                      | 2.44E-06                      | 7.63E-06                      | 1.90E+00                      | 1.09E-02                      |
| 316        | 6.88E-14                                                        | 1.52E-15                      | 1.10E-12                      | 1.38E-07                      | 3.04E-09                      | 2.20E-06                      | 9.72E-05                      | 1.13E+01                      | 9.35E-02                      |
| 331        | 7.11E-14                                                        | 1.85E-15                      | 1.03E-12                      | 1.42E-07                      | 3.70E-09                      | 2.06E-06                      | 5.90E-04                      | 4.02E+01                      | 4.30E-01                      |
| 344        | 7.32E-14                                                        | 2.18E-15                      | 9.75E-13                      | 1.46E-07                      | 4.36E-09                      | 1.95E-06                      | 2.49E-03                      | 1.10E+02                      | 1.45E+00                      |
| 353        | 7.49E-14                                                        | 2.42E-15                      | 9.42E-13                      | 1.50E-07                      | 4.84E-09                      | 1.88E-06                      | 6.33E-03                      | 2.13E+02                      | 3.20E+00                      |
| 362        | 7.64E-14                                                        | 2.69E-15                      | 9.15E-13                      | 1.53E-07                      | 5.38E-09                      | 1.83E-06                      | 1.54E-02                      | 3.97E+02                      | 6.79E+00                      |
| 386        | 8.40E-14                                                        | 4.08E-15                      | 8.28E-13                      | 1.68E-07                      | 8.16E-09                      | 1.66E-06                      | 1.35E-01                      | 1.82E+03                      | 4.25E+01                      |
| 402        | 8.40E-14                                                        | 4.08E-15                      | 8.28E-13                      | 1.68E-07                      | 8.16E-09                      | 1.66E-06                      | 4.97E-01                      | 4.54E+03                      | 1.28E+02                      |
| 425        | 8.89E-14                                                        | 5.05E-15                      | 7.96E-13                      | 1.78E-07                      | 1.01E-08                      | 1.59E-06                      | 2.73E+00                      | 1.50E+04                      | 5.43E+02                      |
| 440        | 9.24E-14                                                        | 5.74E-15                      | 7.78E-13                      | 1.85E-07                      | 1.15E-08                      | 1.56E-06                      | 7.56E+00                      | 3.07E+04                      | 1.28E+03                      |

**Table S3:** Effective bimolecular rate constants ( $\text{cm}^3 \text{ molecule}^{-1} \text{ s}^{-1}$ ), branching ratios (%) and regioselectivity for the pathways 1–3 ( $x=1,2$ ) at different pressures and temperatures, using RRKM theory, and according to the computed M06-2x energy profiles.

**Table S3a:**  $T= 297 \text{ K}$ .

| $P$      | Effective rate constants     |                              |                              | Branching ratios |                 |                 | Regioselectivity |                                                                                                       |                                   |                                   |                                   |
|----------|------------------------------|------------------------------|------------------------------|------------------|-----------------|-----------------|------------------|-------------------------------------------------------------------------------------------------------|-----------------------------------|-----------------------------------|-----------------------------------|
|          | $k_{\text{eff}}(\mathbf{1})$ | $k_{\text{eff}}(\mathbf{2})$ | $k_{\text{eff}}(\mathbf{3})$ | $R(\mathbf{1})$  | $R(\mathbf{2})$ | $R(\mathbf{3})$ | LogP             | $\frac{\{R(\mathbf{3})-[R(\mathbf{1})+R(\mathbf{2})]\}}{[R(\mathbf{1})+R(\mathbf{1})+R(\mathbf{3})]}$ | $\log k_{\text{eff}}(\mathbf{1})$ | $\log k_{\text{eff}}(\mathbf{2})$ | $\log k_{\text{eff}}(\mathbf{3})$ |
| 1.00E+08 | 1.19E-13                     | 2.09E-15                     | 2.39E-12                     | 4.72             | 0.08            | 95.20           | 8                | 0.9039                                                                                                | -12.926                           | -14.679                           | -11.621                           |
| 1.00E+06 | 1.19E-13                     | 2.09E-15                     | 2.39E-12                     | 4.72             | 0.08            | 95.20           | 6                | 0.9039                                                                                                | -12.926                           | -14.679                           | -11.621                           |
| 1.00E+04 | 1.18E-13                     | 2.09E-15                     | 2.38E-12                     | 4.74             | 0.08            | 95.18           | 4                | 0.9035                                                                                                | -12.927                           | -14.679                           | -11.624                           |
| 1.00E+02 | 1.09E-13                     | 2.08E-15                     | 1.54E-12                     | 6.60             | 0.13            | 93.28           | 2                | 0.8656                                                                                                | -12.963                           | -14.683                           | -11.812                           |
| 1.00E+00 | 1.70E-14                     | 1.31E-15                     | 4.77E-14                     | 25.72            | 1.99            | 72.29           | 0                | 0.4458                                                                                                | -13.770                           | -14.882                           | -13.321                           |
| 1.00E-02 | 2.24E-16                     | 5.74E-17                     | 4.90E-16                     | 29.08            | 7.43            | 63.49           | -2               | 0.2697                                                                                                | -15.649                           | -16.241                           | -15.310                           |
| 1.00E-04 | 2.25E-18                     | 6.15E-19                     | 4.90E-18                     | 29.01            | 7.91            | 63.08           | -4               | 0.2617                                                                                                | -17.647                           | -18.211                           | -17.310                           |
| 1.00E-06 | 2.25E-20                     | 6.15E-21                     | 4.90E-20                     | 29.01            | 7.92            | 63.08           | -6               | 0.2616                                                                                                | -19.647                           | -20.211                           | -19.310                           |
| 1.00E-08 | 2.25E-22                     | 6.15E-23                     | 4.90E-22                     | 29.01            | 7.92            | 63.08           | -8               | 0.2616                                                                                                | -21.647                           | -22.211                           | -21.310                           |
| 1.00E-10 | 2.25E-24                     | 6.15E-25                     | 4.90E-24                     | 29.01            | 7.92            | 63.08           | -10              | 0.2616                                                                                                | -23.647                           | -24.211                           | -23.310                           |

**Table S3b:**  $T= 316$  K.

| $P$      | Effective rate constants     |                              |                              | Branching ratios |                 |                 | Regioselectivity |                                                                                                       |                                   |                                   |                                   |
|----------|------------------------------|------------------------------|------------------------------|------------------|-----------------|-----------------|------------------|-------------------------------------------------------------------------------------------------------|-----------------------------------|-----------------------------------|-----------------------------------|
|          | $k_{\text{eff}}(\mathbf{1})$ | $k_{\text{eff}}(\mathbf{2})$ | $k_{\text{eff}}(\mathbf{3})$ | $R(\mathbf{1})$  | $R(\mathbf{2})$ | $R(\mathbf{3})$ | LogP             | $\frac{\{R(\mathbf{3})-[R(\mathbf{1})+R(\mathbf{2})]\}}{[R(\mathbf{1})+R(\mathbf{1})+R(\mathbf{3})]}$ | $\log k_{\text{eff}}(\mathbf{1})$ | $\log k_{\text{eff}}(\mathbf{2})$ | $\log k_{\text{eff}}(\mathbf{3})$ |
| 1.00E+08 | 1.25E-13                     | 2.80E-15                     | 2.17E-12                     | 5.46             | 0.12            | 94.42           | 8                | 0.8884                                                                                                | -12.902                           | -14.553                           | -11.664                           |
| 1.00E+06 | 1.25E-13                     | 2.80E-15                     | 2.17E-12                     | 5.46             | 0.12            | 94.42           | 6                | 0.8884                                                                                                | -12.902                           | -14.553                           | -11.664                           |
| 1.00E+04 | 1.25E-13                     | 2.80E-15                     | 2.15E-12                     | 5.49             | 0.12            | 94.39           | 4                | 0.8878                                                                                                | -12.902                           | -14.553                           | -11.667                           |
| 1.00E+02 | 1.14E-13                     | 2.77E-15                     | 1.34E-12                     | 7.78             | 0.19            | 92.03           | 2                | 0.8406                                                                                                | -12.945                           | -14.557                           | -11.872                           |
| 1.00E+00 | 1.56E-14                     | 1.64E-15                     | 3.86E-14                     | 27.99            | 2.93            | 69.08           | 0                | 0.3817                                                                                                | -13.806                           | -14.786                           | -13.414                           |
| 1.00E-02 | 2.00E-16                     | 6.39E-17                     | 3.95E-16                     | 30.37            | 9.69            | 59.93           | -2               | 0.1986                                                                                                | -15.699                           | -16.195                           | -15.403                           |
| 1.00E-04 | 2.01E-18                     | 6.78E-19                     | 3.95E-18                     | 30.26            | 10.22           | 59.52           | -4               | 0.1903                                                                                                | -17.697                           | -18.168                           | -17.403                           |
| 1.00E-06 | 2.01E-20                     | 6.79E-21                     | 3.95E-20                     | 30.26            | 10.23           | 59.51           | -6               | 0.1902                                                                                                | -19.697                           | -20.168                           | -19.403                           |
| 1.00E-08 | 2.01E-22                     | 6.79E-23                     | 3.95E-22                     | 30.26            | 10.23           | 59.51           | -8               | 0.1902                                                                                                | -21.697                           | -22.168                           | -21.403                           |
| 1.00E-10 | 2.01E-24                     | 6.79E-25                     | 3.95E-24                     | 30.26            | 10.23           | 59.51           | -10              | 0.1902                                                                                                | -23.697                           | -24.168                           | -23.403                           |

**Table S3c:**  $T= 331$  K.

| $P$      | Effective rate constants     |                              |                              | Branching ratios |                 |                 | Regioselectivity |                                                                                                       |                                   |                                   |                                   |
|----------|------------------------------|------------------------------|------------------------------|------------------|-----------------|-----------------|------------------|-------------------------------------------------------------------------------------------------------|-----------------------------------|-----------------------------------|-----------------------------------|
|          | $k_{\text{eff}}(\mathbf{1})$ | $k_{\text{eff}}(\mathbf{2})$ | $k_{\text{eff}}(\mathbf{3})$ | $R(\mathbf{1})$  | $R(\mathbf{2})$ | $R(\mathbf{3})$ | LogP             | $\frac{\{R(\mathbf{3})-[R(\mathbf{1})+R(\mathbf{2})]\}}{[R(\mathbf{1})+R(\mathbf{1})+R(\mathbf{3})]}$ | $\log k_{\text{eff}}(\mathbf{1})$ | $\log k_{\text{eff}}(\mathbf{2})$ | $\log k_{\text{eff}}(\mathbf{3})$ |
| 1.00E+08 | 1.31E-13                     | 3.45E-15                     | 2.03E-12                     | 6.05             | 0.16            | 93.79           | 8                | 0.8758                                                                                                | -12.883                           | -14.462                           | -11.692                           |
| 1.00E+06 | 1.31E-13                     | 3.45E-15                     | 2.03E-12                     | 6.05             | 0.16            | 93.79           | 6                | 0.8758                                                                                                | -12.883                           | -14.462                           | -11.692                           |
| 1.00E+04 | 1.31E-13                     | 3.45E-15                     | 2.02E-12                     | 6.08             | 0.16            | 93.76           | 4                | 0.8752                                                                                                | -12.883                           | -14.462                           | -11.695                           |
| 1.00E+02 | 1.17E-13                     | 3.41E-15                     | 1.22E-12                     | 8.74             | 0.25            | 91.00           | 2                | 0.8201                                                                                                | -12.931                           | -14.467                           | -11.914                           |
| 1.00E+00 | 1.47E-14                     | 1.90E-15                     | 3.32E-14                     | 29.47            | 3.83            | 66.71           | 0                | 0.3342                                                                                                | -13.834                           | -14.721                           | -13.479                           |
| 1.00E-02 | 1.83E-16                     | 6.83E-17                     | 3.39E-16                     | 31.06            | 11.57           | 57.37           | -2               | 0.1474                                                                                                | -15.736                           | -16.165                           | -15.470                           |
| 1.00E-04 | 1.84E-18                     | 7.21E-19                     | 3.39E-18                     | 30.93            | 12.12           | 56.95           | -4               | 0.1390                                                                                                | -17.735                           | -18.142                           | -17.470                           |
| 1.00E-06 | 1.84E-20                     | 7.22E-21                     | 3.39E-20                     | 30.93            | 12.13           | 56.95           | -6               | 0.1390                                                                                                | -19.735                           | -20.142                           | -19.470                           |
| 1.00E-08 | 1.84E-22                     | 7.22E-23                     | 3.39E-22                     | 30.93            | 12.13           | 56.95           | -8               | 0.1390                                                                                                | -21.735                           | -22.142                           | -21.470                           |
| 1.00E-10 | 1.84E-24                     | 7.22E-25                     | 3.39E-24                     | 30.93            | 12.13           | 56.95           | -10              | 0.1390                                                                                                | -23.735                           | -24.142                           | -23.470                           |

**Table S3d:**  $T= 344$  K.

| $P$      | Effective rate constants     |                              |                              | Branching ratios |                 |                 | Regioselectivity |                                                                                                       |                                   |                                   |                                   |
|----------|------------------------------|------------------------------|------------------------------|------------------|-----------------|-----------------|------------------|-------------------------------------------------------------------------------------------------------|-----------------------------------|-----------------------------------|-----------------------------------|
|          | $k_{\text{eff}}(\mathbf{1})$ | $k_{\text{eff}}(\mathbf{2})$ | $k_{\text{eff}}(\mathbf{3})$ | $R(\mathbf{1})$  | $R(\mathbf{2})$ | $R(\mathbf{3})$ | LogP             | $\frac{\{R(\mathbf{3})-[R(\mathbf{1})+R(\mathbf{2})]\}}{[R(\mathbf{1})+R(\mathbf{1})+R(\mathbf{3})]}$ | $\log k_{\text{eff}}(\mathbf{1})$ | $\log k_{\text{eff}}(\mathbf{2})$ | $\log k_{\text{eff}}(\mathbf{3})$ |
| 1.00E+08 | 1.36E-13                     | 4.09E-15                     | 1.94E-12                     | 6.56             | 0.20            | 93.25           | 8                | 0.8649                                                                                                | -12.866                           | -14.388                           | -11.713                           |
| 1.00E+06 | 1.36E-13                     | 4.09E-15                     | 1.94E-12                     | 6.56             | 0.20            | 93.25           | 6                | 0.8649                                                                                                | -12.866                           | -14.388                           | -11.713                           |
| 1.00E+04 | 1.36E-13                     | 4.09E-15                     | 1.92E-12                     | 6.59             | 0.20            | 93.21           | 4                | 0.8642                                                                                                | -12.867                           | -14.388                           | -11.716                           |
| 1.00E+02 | 1.20E-13                     | 4.04E-15                     | 1.13E-12                     | 9.58             | 0.32            | 90.10           | 2                | 0.8019                                                                                                | -12.919                           | -14.393                           | -11.946                           |
| 1.00E+00 | 1.39E-14                     | 2.14E-15                     | 2.95E-14                     | 30.52            | 4.71            | 64.77           | 0                | 0.2955                                                                                                | -13.858                           | -14.669                           | -13.531                           |
| 1.00E-02 | 1.71E-16                     | 7.17E-17                     | 3.00E-16                     | 31.45            | 13.22           | 55.34           | -2               | 0.1067                                                                                                | -15.768                           | -16.144                           | -15.522                           |
| 1.00E-04 | 1.71E-18                     | 7.54E-19                     | 3.00E-18                     | 31.29            | 13.78           | 54.92           | -4               | 0.0985                                                                                                | -17.767                           | -18.123                           | -17.522                           |
| 1.00E-06 | 1.71E-20                     | 7.54E-21                     | 3.00E-20                     | 31.29            | 13.79           | 54.92           | -6               | 0.0984                                                                                                | -19.767                           | -20.122                           | -19.522                           |
| 1.00E-08 | 1.71E-22                     | 7.54E-23                     | 3.00E-22                     | 31.29            | 13.79           | 54.92           | -8               | 0.0984                                                                                                | -21.767                           | -22.122                           | -21.522                           |
| 1.00E-10 | 1.71E-24                     | 7.54E-25                     | 3.00E-24                     | 31.29            | 13.79           | 54.92           | -10              | 0.0984                                                                                                | -23.767                           | -24.122                           | -23.522                           |



**Table S3e:**  $T= 353$  K.

| $P$      | Effective rate constants     |                              |                              | Branching ratios |                 |                 | Regioselectivity |                                                                                                       |                                   |                                   |                                   |
|----------|------------------------------|------------------------------|------------------------------|------------------|-----------------|-----------------|------------------|-------------------------------------------------------------------------------------------------------|-----------------------------------|-----------------------------------|-----------------------------------|
|          | $k_{\text{eff}}(\mathbf{1})$ | $k_{\text{eff}}(\mathbf{2})$ | $k_{\text{eff}}(\mathbf{3})$ | $R(\mathbf{1})$  | $R(\mathbf{2})$ | $R(\mathbf{3})$ | LogP             | $\frac{\{R(\mathbf{3})-[R(\mathbf{1})+R(\mathbf{2})]\}}{[R(\mathbf{1})+R(\mathbf{1})+R(\mathbf{3})]}$ | $\log k_{\text{eff}}(\mathbf{1})$ | $\log k_{\text{eff}}(\mathbf{2})$ | $\log k_{\text{eff}}(\mathbf{3})$ |
| 1.00E+08 | 1.40E-13                     | 4.57E-15                     | 1.87E-12                     | 6.93             | 0.23            | 92.85           | 8                | 0.8569                                                                                                | -12.854                           | -14.340                           | -11.727                           |
| 1.00E+06 | 1.40E-13                     | 4.57E-15                     | 1.87E-12                     | 6.93             | 0.23            | 92.85           | 6                | 0.8569                                                                                                | -12.854                           | -14.340                           | -11.727                           |
| 1.00E+04 | 1.40E-13                     | 4.57E-15                     | 1.86E-12                     | 6.97             | 0.23            | 92.81           | 4                | 0.8561                                                                                                | -12.855                           | -14.340                           | -11.731                           |
| 1.00E+02 | 1.23E-13                     | 4.51E-15                     | 1.08E-12                     | 10.20            | 0.37            | 89.43           | 2                | 0.7886                                                                                                | -12.911                           | -14.346                           | -11.968                           |
| 1.00E+00 | 1.34E-14                     | 2.30E-15                     | 2.72E-14                     | 31.20            | 5.37            | 63.43           | 0                | 0.2686                                                                                                | -13.874                           | -14.638                           | -13.565                           |
| 1.00E-02 | 1.63E-16                     | 7.37E-17                     | 2.77E-16                     | 31.69            | 14.35           | 53.97           | -2               | 0.0793                                                                                                | -15.789                           | -16.133                           | -15.557                           |
| 1.00E-04 | 1.63E-18                     | 7.72E-19                     | 2.77E-18                     | 31.53            | 14.92           | 53.56           | -4               | 0.0711                                                                                                | -17.787                           | -18.112                           | -17.557                           |
| 1.00E-06 | 1.63E-20                     | 7.72E-21                     | 2.77E-20                     | 31.52            | 14.92           | 53.55           | -6               | 0.0711                                                                                                | -19.787                           | -20.112                           | -19.557                           |
| 1.00E-08 | 1.63E-22                     | 7.72E-23                     | 2.77E-22                     | 31.52            | 14.92           | 53.55           | -8               | 0.0711                                                                                                | -21.787                           | -22.112                           | -21.557                           |
| 1.00E-10 | 1.63E-24                     | 7.72E-25                     | 2.77E-24                     | 31.52            | 14.92           | 53.55           | -10              | 0.0711                                                                                                | -23.787                           | -24.112                           | -23.557                           |

**Table S3f:**  $T= 362$  K.

| $P$      | Effective rate constants     |                              |                              | Branching ratios |                 |                 | Regioselectivity |                                                                                                       |                                   |                                   |                                   |
|----------|------------------------------|------------------------------|------------------------------|------------------|-----------------|-----------------|------------------|-------------------------------------------------------------------------------------------------------|-----------------------------------|-----------------------------------|-----------------------------------|
|          | $k_{\text{eff}}(\mathbf{1})$ | $k_{\text{eff}}(\mathbf{2})$ | $k_{\text{eff}}(\mathbf{3})$ | $R(\mathbf{1})$  | $R(\mathbf{2})$ | $R(\mathbf{3})$ | LogP             | $\frac{\{R(\mathbf{3})-[R(\mathbf{1})+R(\mathbf{2})]\}}{[R(\mathbf{1})+R(\mathbf{1})+R(\mathbf{3})]}$ | $\log k_{\text{eff}}(\mathbf{1})$ | $\log k_{\text{eff}}(\mathbf{2})$ | $\log k_{\text{eff}}(\mathbf{3})$ |
| 1.00E+08 | 1.43E-13                     | 5.09E-15                     | 1.82E-12                     | 7.27             | 0.26            | 92.47           | 8                | 0.8494                                                                                                | -12.843                           | -14.293                           | -11.739                           |
| 1.00E+06 | 1.43E-13                     | 5.09E-15                     | 1.82E-12                     | 7.27             | 0.26            | 92.47           | 6                | 0.8494                                                                                                | -12.843                           | -14.293                           | -11.739                           |
| 1.00E+04 | 1.43E-13                     | 5.09E-15                     | 1.81E-12                     | 7.31             | 0.26            | 92.43           | 4                | 0.8485                                                                                                | -12.844                           | -14.293                           | -11.742                           |
| 1.00E+02 | 1.25E-13                     | 5.02E-15                     | 1.03E-12                     | 10.78            | 0.43            | 88.79           | 2                | 0.7758                                                                                                | -12.904                           | -14.300                           | -11.988                           |
| 1.00E+00 | 1.29E-14                     | 2.47E-15                     | 2.53E-14                     | 31.71            | 6.08            | 62.21           | 0                | 0.2442                                                                                                | -13.890                           | -14.607                           | -13.597                           |
| 1.00E-02 | 1.55E-16                     | 7.55E-17                     | 2.57E-16                     | 31.78            | 15.48           | 52.74           | -2               | 0.0548                                                                                                | -15.810                           | -16.122                           | -15.589                           |
| 1.00E-04 | 1.55E-18                     | 7.89E-19                     | 2.57E-18                     | 31.61            | 16.05           | 52.34           | -4               | 0.0468                                                                                                | -17.808                           | -18.103                           | -17.589                           |
| 1.00E-06 | 1.55E-20                     | 7.90E-21                     | 2.57E-20                     | 31.61            | 16.06           | 52.34           | -6               | 0.0467                                                                                                | -19.808                           | -20.102                           | -19.589                           |
| 1.00E-08 | 1.55E-22                     | 7.90E-23                     | 2.57E-22                     | 31.61            | 16.06           | 52.34           | -8               | 0.0467                                                                                                | -21.808                           | -22.102                           | -21.589                           |
| 1.00E-10 | 1.55E-24                     | 7.90E-25                     | 2.57E-24                     | 31.61            | 16.06           | 52.34           | -10              | 0.0467                                                                                                | -23.808                           | -24.102                           | -23.589                           |

**Table S3g:**  $T= 386$  K.

| $P$      | Effective rate constants     |                              |                              | Branching ratios |                 |                 | Regioselectivity |                                                                                                       |                                   |                                   |                                   |
|----------|------------------------------|------------------------------|------------------------------|------------------|-----------------|-----------------|------------------|-------------------------------------------------------------------------------------------------------|-----------------------------------|-----------------------------------|-----------------------------------|
|          | $k_{\text{eff}}(\mathbf{1})$ | $k_{\text{eff}}(\mathbf{2})$ | $k_{\text{eff}}(\mathbf{3})$ | $R(\mathbf{1})$  | $R(\mathbf{2})$ | $R(\mathbf{3})$ | LogP             | $\frac{\{R(\mathbf{3})-[R(\mathbf{1})+R(\mathbf{2})]\}}{[R(\mathbf{1})+R(\mathbf{1})+R(\mathbf{3})]}$ | $\log k_{\text{eff}}(\mathbf{1})$ | $\log k_{\text{eff}}(\mathbf{2})$ | $\log k_{\text{eff}}(\mathbf{3})$ |
| 1.00E+08 | 1.54E-13                     | 6.64E-15                     | 1.71E-12                     | 8.20             | 0.35            | 91.45           | 8                | 0.8290                                                                                                | -12.814                           | -14.178                           | -11.766                           |
| 1.00E+06 | 1.54E-13                     | 6.64E-15                     | 1.71E-12                     | 8.20             | 0.35            | 91.45           | 6                | 0.8290                                                                                                | -12.814                           | -14.178                           | -11.766                           |
| 1.00E+04 | 1.53E-13                     | 6.64E-15                     | 1.70E-12                     | 8.25             | 0.36            | 91.39           | 4                | 0.8278                                                                                                | -12.814                           | -14.178                           | -11.770                           |
| 1.00E+02 | 1.31E-13                     | 6.53E-15                     | 9.21E-13                     | 12.34            | 0.62            | 87.04           | 2                | 0.7409                                                                                                | -12.884                           | -14.185                           | -12.036                           |
| 1.00E+00 | 1.17E-14                     | 2.90E-15                     | 2.11E-14                     | 32.73            | 8.12            | 59.15           | 0                | 0.1830                                                                                                | -13.932                           | -14.537                           | -13.675                           |
| 1.00E-02 | 1.37E-16                     | 7.94E-17                     | 2.15E-16                     | 31.80            | 18.41           | 49.79           | -2               | -0.0042                                                                                               | -15.863                           | -16.100                           | -15.668                           |
| 1.00E-04 | 1.37E-18                     | 8.24E-19                     | 2.15E-18                     | 31.62            | 18.97           | 49.42           | -4               | -0.0117                                                                                               | -17.862                           | -18.084                           | -17.668                           |
| 1.00E-06 | 1.37E-20                     | 8.24E-21                     | 2.15E-20                     | 31.62            | 18.97           | 49.41           | -6               | -0.0118                                                                                               | -19.862                           | -20.084                           | -19.668                           |
| 1.00E-08 | 1.37E-22                     | 8.24E-23                     | 2.15E-22                     | 31.62            | 18.97           | 49.41           | -8               | -0.0118                                                                                               | -21.862                           | -22.084                           | -21.668                           |
| 1.00E-10 | 1.37E-24                     | 8.24E-25                     | 2.15E-24                     | 31.62            | 18.97           | 49.41           | -10              | -0.0118                                                                                               | -23.862                           | -24.084                           | -23.668                           |

**Table S3h:**  $T= 402$  K.

| $P$      | Effective rate constants     |                              |                              | Branching ratios |                 |                 | Regioselectivity |                                                                                                       |                                   |                                   |                                   |
|----------|------------------------------|------------------------------|------------------------------|------------------|-----------------|-----------------|------------------|-------------------------------------------------------------------------------------------------------|-----------------------------------|-----------------------------------|-----------------------------------|
|          | $k_{\text{eff}}(\mathbf{1})$ | $k_{\text{eff}}(\mathbf{2})$ | $k_{\text{eff}}(\mathbf{3})$ | $R(\mathbf{1})$  | $R(\mathbf{2})$ | $R(\mathbf{3})$ | LogP             | $\frac{\{R(\mathbf{3})-[R(\mathbf{1})+R(\mathbf{2})]\}}{[R(\mathbf{1})+R(\mathbf{1})+R(\mathbf{3})]}$ | $\log k_{\text{eff}}(\mathbf{1})$ | $\log k_{\text{eff}}(\mathbf{2})$ | $\log k_{\text{eff}}(\mathbf{3})$ |
| 1.00E+08 | 1.60E-13                     | 7.84E-15                     | 1.66E-12                     | 8.76             | 0.43            | 90.81           | 8                | 0.8162                                                                                                | -12.795                           | -14.106                           | -11.780                           |
| 1.00E+06 | 1.60E-13                     | 7.84E-15                     | 1.66E-12                     | 8.76             | 0.43            | 90.81           | 6                | 0.8162                                                                                                | -12.795                           | -14.106                           | -11.780                           |
| 1.00E+04 | 1.60E-13                     | 7.84E-15                     | 1.64E-12                     | 8.82             | 0.43            | 90.75           | 4                | 0.8149                                                                                                | -12.796                           | -14.106                           | -11.784                           |
| 1.00E+02 | 1.34E-13                     | 7.68E-15                     | 8.64E-13                     | 13.31            | 0.76            | 85.93           | 2                | 0.7186                                                                                                | -12.873                           | -14.115                           | -12.063                           |
| 1.00E+00 | 1.09E-14                     | 3.19E-15                     | 1.90E-14                     | 33.01            | 9.61            | 57.38           | 0                | 0.1477                                                                                                | -13.961                           | -14.496                           | -13.720                           |
| 1.00E-02 | 1.26E-16                     | 8.13E-17                     | 1.93E-16                     | 31.54            | 20.29           | 48.17           | -2               | -0.0365                                                                                               | -15.898                           | -16.090                           | -15.714                           |
| 1.00E-04 | 1.27E-18                     | 8.41E-19                     | 1.93E-18                     | 31.36            | 20.82           | 47.82           | -4               | -0.0436                                                                                               | -17.898                           | -18.075                           | -17.714                           |
| 1.00E-06 | 1.27E-20                     | 8.41E-21                     | 1.93E-20                     | 31.36            | 20.83           | 47.81           | -6               | -0.0437                                                                                               | -19.898                           | -20.075                           | -19.714                           |
| 1.00E-08 | 1.27E-22                     | 8.41E-23                     | 1.93E-22                     | 31.36            | 20.83           | 47.81           | -8               | -0.0437                                                                                               | -21.898                           | -22.075                           | -21.714                           |
| 1.00E-10 | 1.27E-24                     | 8.41E-25                     | 1.93E-24                     | 31.36            | 20.83           | 47.81           | -10              | -0.0437                                                                                               | -23.898                           | -24.075                           | -23.714                           |

**Table S3i:**  $T= 425$  K.

| $P$      | Effective rate constants     |                              |                              | Branching ratios |                 |                 | Regioselectivity |                                                                                                       |                                   |                                   |                                   |
|----------|------------------------------|------------------------------|------------------------------|------------------|-----------------|-----------------|------------------|-------------------------------------------------------------------------------------------------------|-----------------------------------|-----------------------------------|-----------------------------------|
|          | $k_{\text{eff}}(\mathbf{1})$ | $k_{\text{eff}}(\mathbf{2})$ | $k_{\text{eff}}(\mathbf{3})$ | $R(\mathbf{1})$  | $R(\mathbf{2})$ | $R(\mathbf{3})$ | LogP             | $\frac{\{R(\mathbf{3})-[R(\mathbf{1})+R(\mathbf{2})]\}}{[R(\mathbf{1})+R(\mathbf{1})+R(\mathbf{3})]}$ | $\log k_{\text{eff}}(\mathbf{1})$ | $\log k_{\text{eff}}(\mathbf{2})$ | $\log k_{\text{eff}}(\mathbf{3})$ |
| 1.00E+08 | 1.71E-13                     | 9.77E-15                     | 1.60E-12                     | 9.60             | 0.55            | 89.85           | 8                | 0.7969                                                                                                | -12.767                           | -14.010                           | -11.796                           |
| 1.00E+06 | 1.71E-13                     | 9.77E-15                     | 1.60E-12                     | 9.60             | 0.55            | 89.85           | 6                | 0.7970                                                                                                | -12.767                           | -14.010                           | -11.796                           |
| 1.00E+04 | 1.70E-13                     | 9.76E-15                     | 1.58E-12                     | 9.67             | 0.55            | 89.77           | 4                | 0.7955                                                                                                | -12.768                           | -14.010                           | -11.801                           |
| 1.00E+02 | 1.39E-13                     | 9.52E-15                     | 7.95E-13                     | 14.73            | 1.01            | 84.26           | 2                | 0.6852                                                                                                | -12.857                           | -14.021                           | -12.099                           |
| 1.00E+00 | 1.00E-14                     | 3.57E-15                     | 1.66E-14                     | 33.23            | 11.82           | 54.96           | 0                | 0.0991                                                                                                | -13.998                           | -14.447                           | -13.780                           |
| 1.00E-02 | 1.14E-16                     | 8.30E-17                     | 1.68E-16                     | 31.15            | 22.75           | 46.09           | -2               | -0.0782                                                                                               | -15.945                           | -16.081                           | -15.774                           |
| 1.00E-04 | 1.14E-18                     | 8.54E-19                     | 1.68E-18                     | 30.98            | 23.25           | 45.77           | -4               | -0.0846                                                                                               | -17.944                           | -18.069                           | -17.774                           |
| 1.00E-06 | 1.14E-20                     | 8.54E-21                     | 1.68E-20                     | 30.98            | 23.26           | 45.77           | -6               | -0.0847                                                                                               | -19.944                           | -20.068                           | -19.774                           |
| 1.00E-08 | 1.14E-22                     | 8.54E-23                     | 1.68E-22                     | 30.98            | 23.26           | 45.77           | -8               | -0.0847                                                                                               | -21.944                           | -22.068                           | -21.774                           |
| 1.00E-10 | 1.14E-24                     | 8.54E-25                     | 1.68E-24                     | 30.98            | 23.26           | 45.77           | -10              | -0.0847                                                                                               | -23.944                           | -24.068                           | -23.774                           |

**Table S3j:**  $T= 440$  K.

| $P$      | Effective rate constants     |                              |                              | Branching ratios |                 |                 | Regioselectivity |                                                                                                       |                                   |                                   |                                   |
|----------|------------------------------|------------------------------|------------------------------|------------------|-----------------|-----------------|------------------|-------------------------------------------------------------------------------------------------------|-----------------------------------|-----------------------------------|-----------------------------------|
|          | $k_{\text{eff}}(\mathbf{1})$ | $k_{\text{eff}}(\mathbf{2})$ | $k_{\text{eff}}(\mathbf{3})$ | $R(\mathbf{1})$  | $R(\mathbf{2})$ | $R(\mathbf{3})$ | LogP             | $\frac{\{R(\mathbf{3})-[R(\mathbf{1})+R(\mathbf{2})]\}}{[R(\mathbf{1})+R(\mathbf{1})+R(\mathbf{3})]}$ | $\log k_{\text{eff}}(\mathbf{1})$ | $\log k_{\text{eff}}(\mathbf{2})$ | $\log k_{\text{eff}}(\mathbf{3})$ |
| 1.00E+08 | 1.78E-13                     | 1.11E-14                     | 1.56E-12                     | 10.16            | 0.64            | 89.21           | 8                | 0.7841                                                                                                | -12.749                           | -13.953                           | -11.806                           |
| 1.00E+06 | 1.78E-13                     | 1.11E-14                     | 1.56E-12                     | 10.16            | 0.64            | 89.21           | 6                | 0.7841                                                                                                | -12.749                           | -13.953                           | -11.806                           |
| 1.00E+04 | 1.78E-13                     | 1.11E-14                     | 1.55E-12                     | 10.23            | 0.64            | 89.12           | 4                | 0.7825                                                                                                | -12.750                           | -13.953                           | -11.810                           |
| 1.00E+02 | 1.42E-13                     | 1.08E-14                     | 7.56E-13                     | 15.66            | 1.19            | 83.15           | 2                | 0.6630                                                                                                | -12.846                           | -13.965                           | -12.121                           |
| 1.00E+00 | 9.50E-15                     | 3.79E-15                     | 1.53E-14                     | 33.24            | 13.28           | 53.48           | 0                | 0.0696                                                                                                | -14.022                           | -14.421                           | -13.816                           |
| 1.00E-02 | 1.06E-16                     | 8.34E-17                     | 1.55E-16                     | 30.72            | 24.21           | 44.90           | -2               | -0.1020                                                                                               | -15.973                           | -16.079                           | -15.811                           |
| 1.00E-04 | 1.06E-18                     | 8.56E-19                     | 1.55E-18                     | 30.72            | 24.68           | 44.60           | -4               | -0.1080                                                                                               | -17.973                           | -18.068                           | -17.811                           |
| 1.00E-06 | 1.06E-20                     | 8.56E-21                     | 1.55E-20                     | 30.72            | 24.69           | 44.60           | -6               | -0.1080                                                                                               | -19.973                           | -20.068                           | -19.811                           |
| 1.00E-08 | 1.06E-22                     | 8.56E-23                     | 1.55E-22                     | 30.72            | 24.69           | 44.60           | -8               | -0.1080                                                                                               | -21.973                           | -22.068                           | -21.811                           |
| 1.00E-10 | 1.06E-24                     | 8.56E-25                     | 1.55E-24                     | 30.72            | 24.69           | 44.60           | -10              | -0.1080                                                                                               | -23.973                           | -24.068                           | -23.811                           |
